# Supplementary material for: A six-microRNA signature can better predict overall survival of patients with esophagus adenocarcinoma
Source: PeerJ journal article supplement (doi:10.7717/peerj.7353), 2019-07-25

A

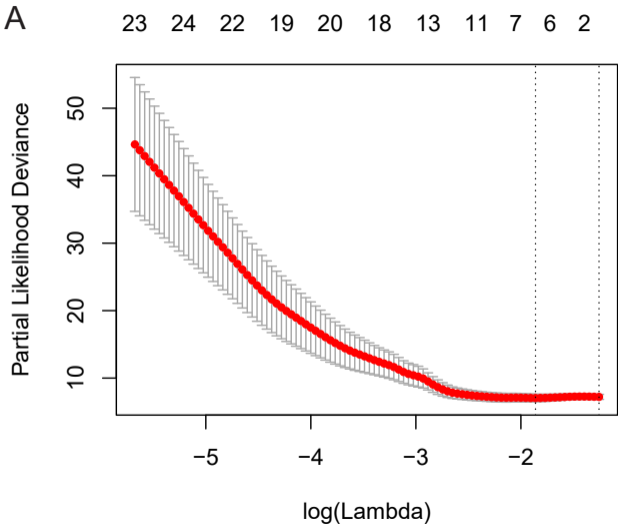

B

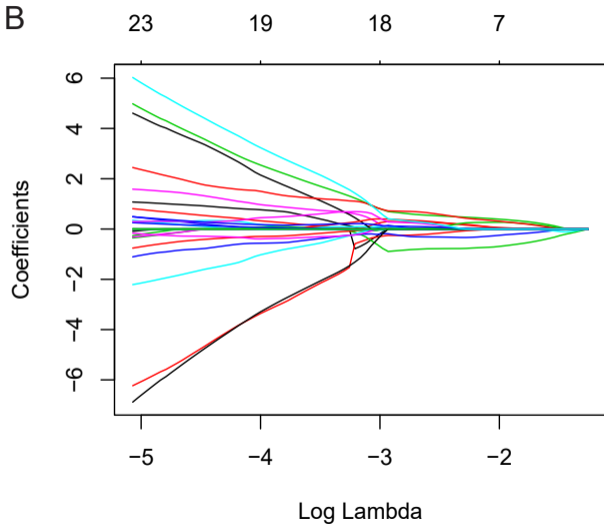

Supplement: fig_s1.pdf [file fig_s1.pdf]
