# Supplementary material for: A six-microRNA signature can better predict overall survival of patients with esophagus adenocarcinoma
Source: PeerJ. 2019 Jul 25;7:e7353. doi: 10.7717/peerj.7353 (PMC6661144; doi:10.7717/peerj.7353)
Supplement: Supplemental Information 4 [file peerj-07-7353-s004.xlsx]

## Sheet: Sheet1
characteristics	Hazard.Ratio	CI95	P.Value
hsa_let_7a_1	0.64	0.45-0.92	0.017
hsa_let_7a_2	0.64	0.45-0.92	0.017
hsa_let_7a_3	0.65	0.45-0.93	0.018
hsa_let_7b	0.44	0.28-0.7	0
hsa_mir_1_1	0.86	0.72-1.02	0.082
hsa_mir_101_1	0.36	0.21-0.63	0
hsa_mir_101_2	0.37	0.21-0.64	0
hsa_mir_10a	0.73	0.56-0.94	0.015
hsa_mir_1266	1.46	1.04-2.06	0.03
hsa_mir_1296	1.44	0.99-2.08	0.055
hsa_mir_1301	1.94	1.29-2.92	0.001
hsa_mir_1307	1.51	1.02-2.25	0.041
hsa_mir_143	0.71	0.52-0.97	0.031
hsa_mir_150	0.82	0.65-1.03	0.089
hsa_mir_186	3.1	1.48-6.49	0.003
hsa_mir_18a	1.41	1.02-1.94	0.036
hsa_mir_191	1.75	1.16-2.65	0.008
hsa_mir_196b	1.23	0.99-1.55	0.067
hsa_mir_197	2.93	1.65-5.22	0
hsa_mir_200b	0.73	0.52-1.01	0.06
hsa_mir_218_1	0.74	0.55-1.02	0.063
hsa_mir_22	0.44	0.23-0.87	0.019
hsa_mir_23a	0.38	0.18-0.77	0.008
hsa_mir_23b	0.47	0.3-0.72	0.001
hsa_mir_24_1	0.48	0.23-1.01	0.054
hsa_mir_24_2	0.52	0.25-1.07	0.077
hsa_mir_27a	0.36	0.18-0.72	0.004
hsa_mir_27b	0.48	0.29-0.78	0.003
hsa_mir_29a	0.48	0.3-0.76	0.002
hsa_mir_29b_1	0.66	0.42-1.02	0.06
hsa_mir_29b_2	0.65	0.41-1.02	0.062
hsa_mir_29c	0.63	0.46-0.88	0.007
hsa_mir_301a	1.83	1.16-2.89	0.009
hsa_mir_3074	2.12	1.43-3.16	0
hsa_mir_320a	3.34	1.57-7.14	0.002
hsa_mir_324	2.52	1.44-4.39	0.001
hsa_mir_345	1.97	1.18-3.28	0.01
hsa_mir_362	1.5	0.94-2.4	0.091
hsa_mir_3653	1.44	0.99-2.11	0.059
hsa_mir_365a	0.61	0.35-1.08	0.089
hsa_mir_365b	0.62	0.35-1.08	0.092
hsa_mir_3677	1.39	0.95-2.04	0.09
hsa_mir_421	1.79	1.18-2.7	0.006
hsa_mir_423	1.66	0.92-3	0.089
hsa_mir_424	1.56	0.97-2.51	0.067
hsa_mir_425	1.8	1.27-2.56	0.001
hsa_mir_4326	1.22	0.97-1.53	0.086
hsa_mir_4746	1.45	0.99-2.12	0.055
hsa_mir_484	2.05	1.06-3.99	0.034
hsa_mir_500a	1.61	1.02-2.56	0.043
hsa_mir_501	1.76	1.16-2.68	0.008
hsa_mir_503	1.5	1.09-2.06	0.014
hsa_mir_505	3.39	1.75-6.6	0
hsa_mir_576	1.65	1.02-2.7	0.043
hsa_mir_590	2.09	1.19-3.69	0.011
hsa_mir_592	1.3	0.95-1.77	0.096
hsa_mir_629	1.65	0.96-2.83	0.073
hsa_mir_675	1.13	0.99-1.29	0.071
hsa_mir_7_3	1.23	0.96-1.57	0.099
hsa_mir_766	1.75	1.1-2.79	0.018
hsa_mir_9_1	1.18	1-1.4	0.052
hsa_mir_9_2	1.19	1-1.4	0.047
hsa_mir_9_3	1.18	1-1.4	0.049
hsa_mir_93	1900-01-01 17:02:24	1.12-2.6	00:18:43.200000
